# Supplementary material for: Alterations of Total Serum Immunoglobulin Concentrations in Pemphigus and Pemphigoid: Selected IgG2 Deficiency in Bullous Pemphigoid
Source: Front Med (Lausanne). 2020 Sep 2;7:472. doi: 10.3389/fmed.2020.00472 (PMC7493804; doi:10.3389/fmed.2020.00472)
Supplement: Supplementary file 1 [file Table_1.xlsx]

## Sheet: Data
Numero	Condition	Group	IDN	IgM, mg/mL	IgA, mg/mL	IgG, mg/mL	IgG1, mg/mL	IgG2, mg/mL	IgG3, mg/mL	IgG4, mg/mL	Sex	Age, years	BP180, U/mL	Dsg1, U/mL	Dsg3, U/mL	LAD-1	DIF (C3, IgG, or IgA)
1	cntrl	AD	AD_01	0.14966	0.04405		3.8175		0.3468	0.01528	female
2	cntrl	AD	AD_41	0.26997	0.22206	3.80298		3.304	0.4916	0.04113	male	89
3	cntrl	AD	AD_42	0.40722	0.22391	2.87843	1.5705	0.4363	0.2914	0.0251	female	82
4	cntrl	AD	AD_43	0.35632		7.18025	5.14425	1.2135	0.4194	0.0143	female	83
5	cntrl	AD	AD_44	0.18538	0.10464	5.885	2.286	1.797	0.3312	0.03317	male	82
6	cntrl	AD	AD_45	0.21057	0.10621	2.69198	3.564		0.5852		female	77
7	cntrl	AD	AD_46	0.36319	0.16695	4.69673	2.766	1.0494	0.3458	0.02799	female	84
8	cntrl	AD	AD_47	0.41555	0.35643	9.4215		1.2518	0.2156	0.06708	female	80
9	cntrl	AD	AD_48	0.26763	0.5269	6.3635	9.1605	2.164	0.7783	0.10035	male	83
10	cntrl	AD	AD_54	0.28479	0.31309	5.38368	3.52575	1.6591	0.2642	0.01737	male	92
11	cntrl	AD	AD_56	0.26917	0.22899	4.4539	4.13775	5.08	1.8703	0.1088	male	78
12	cntrl	AD	AD_57	0.51568	0.47149	6.42675	4.086	1.0342	0.3395	0.0382	female	86
13	cntrl	AD	AD_59	0.19192	0.22151	4.57545	2.0445	6.704	1.1141	0.02088	female	90
14	cntrl	AD	AD_60	0.14289	0.27995	3.70095	1.42335	1.8239	0.7496	0.00236	female	85
15	cntrl	AD	AD_61	0.19192	0.28262	4.06835	3.3885	1.0742	0.4248	0.0394	female	75
16	cntrl	AD	AD_62		0.11481	5.06055	2.1195	0.6217	1.6691	0.01512	male	75
17	cntrl	AD	AD_63	0.44949	0.22663	8.59128	2.89275	1.548	0.3449	0.0402	female	76
18	cntrl	AD	AD_64	0.52091	0.31147	5.96475		1.6725	0.9215	0.09313	female	86
19	cntrl	AD	AD_66	0.45477	0.23639	2.60893	1.08548	4.899	0.4068		female	76
20	cntrl	AD	AD_67	0.23771		4.4132	1.52025	0.821	0.2434	0.03276	female	88
21	cntrl	AD	AD_68	0.82995	0.19663		1.48643		0.2614	0.01495	female	78
22	cntrl	AD	AD_69	0.44949	0.2326	5.885	2.7		0.515	0.05085	male	77
23	cntrl	AD	AD_70	0.1895	0.31345	3.22933			1.5962		male	81
24	cntrl	AD	AD_71	0.27387	0.36451	6.864	6.63675	0.7792	0.12278	0.01329	female	78
25	cntrl	AD	AD_72	0.59758	0.22985	5.2217	3.35025	1.0609	0.506	0.01512	female	76
26	cntrl	AD	AD_73	0.32802	0.13285	3.82333	1.80375	1.2059	0.2049	0.01625	female	78
27	cntrl	AD	AD_74	0.07043	0.12438	4.51495	2.3895	0.7849		0.00123	male	83
28	cntrl	AD	AD_75	0.57503		6.62475	5.60775	2.129	0.5168	0.02259	female	81
29	cntrl	AD	AD_76	0.44495	0.06886	4.21053	1.668	0.9314	0.2942	0.02408	female	80
30	cntrl	AD	AD_77	0.34337	0.19745	2.33805		1.3874	0.4475	0.0382	female	82
31	cntrl	AD	AD_78	0.23056	0.37488	5.02013	2.766	1.9731	0.5231	0.0578	male	76
32	cntrl	AD	AD_79	0.06174	0.07813	1.77045	0.798		0.251	0.00678	male	78
33	cntrl	AD	AD_80	0.18618	0.11745	3.476			0.3495		female	82
34	cntrl	AD	AD_81	0.19355	0.23837	3.00108	1.77225	0.6862	0.17429	0.01641	female	82
35	cntrl	AD	AD_82	0.45854	0.24742	2.12768	1.93425		0.2125	0.04004	female	78
36	cntrl	AD	AD_83	0.15639	0.06977		1.7085		2.843	0.02094	male	79
37	cntrl	AD	AD_84	0.51568	0.14165	5.78518	5.1195		0.3082	0.2048	male	80
38	cntrl	AD	AD_85	0.16973	0.21681	2.98183	1.2711		0.2441		male	80
39	cntrl	AD	AD_86				2.7615			0.0267	male	77
40	cntrl	AD	AD_87				4.03125		0.6929	0.05063	male	81
41	cntrl	AD	AD_88				0.90023		0.2496	0.01105	male	76
42	cntrl	AD	AD_89				1.06583	1.0348	0.16348		female	75
43	cntrl	AD	AD_90				2.6325	1.9663		0.0198	female	81
44	cntrl	AD	AD_91				3.699	0.2538	0.2925	0.0782	male	81
45	cntrl	AD	AD_92				3.27825	1.2723	0.4298	0.1387	male	78
46	cntrl	AD	AD_93					0.9277	0.2796	0.03322	male	80
47	cntrl	AD	AD_94					0.6304	0.0976		male	80
48	cntrl	AD	AD_95					0.6451	0.10108	0.0974	male	80
49	cntrl	AD	AD_96					0.4702	0.2956	0.05438	male	78
50	cntrl	AD	AD_97					1.0342	0.2519	0.02344	male	85
51	cntrl	AD	AD_98					1.2448	0.15361	0.00797	female	81
52	cntrl	HD	HD_01	1.5895	0.398			1.783	0.3758	0.01904	female	31
53	cntrl	HD	HD_02	1.0125	0.24055	6.6395		0.647	0.4664	0.01184	female	27
54	cntrl	HD	HD_03	1.184	0.3636	6.4895		1.2627	0.06928	0.01078	female	27
55	cntrl	HD	HD_04	1.918	0.31075	6.1725		1.9133	0.5896	0.01091	female	19
56	cntrl	HD	HD_05	1.6455	0.1693	6.564		1.7504	0.3018	0.00445	female	24
57	cntrl	HD	HD_06	2.613	0.3583	6.308		1.119	0.3007	0.02383	male	33
58	cntrl	HD	HD_07	0.7773	0.27005	7.09	1.97175		0.12332	0.07548	male	37
59	cntrl	HD	HD_08	0.61375	0.2469	6.3235	0.72833		0.3041		male	26
60	cntrl	HD	HD_09	0.7761	0.35705	8.016	3.36375		0.3822	0.1079	male	23
61	cntrl	HD	HD_10	1.7615	0.2524	5.642	0.93203		0.18548	0.01105	female	21
62	cntrl	HD	HD_11	2.5925	0.6229	5.718	2.9295		0.3684	0.07255	female	26
63	cntrl	HD	HD_12	1.797	0.1469	4.2705	1.701		0.4029	0.05788	female	26
64	cntrl	HD	HD_13	1.248	0.1605	5.535	1.08308	1.1104	0.3302	0.01449	female	24
65	cntrl	HD	HD_14	1.274	0.19435	5.0605	0.78255	0.9428	0.15512	0.00216	female	21
66	cntrl	HD	HD_15	1.148	0.2375	3.388	0.54548	0.7712	0.3803	0.09965	female	23
67	cntrl	HD	HD_16	1.575	0.2225	6.6025	1.52775	1.1951	0.358	0.05395	female	22
68	cntrl	HD	HD_17	1.2855	0.22375	5.0145	0.85268	1.2834	0.3145	0.00699	female	25
69	cntrl	HD	HD_18	0.7163	0.51545	5.445	2.87175	1.1579	0.3775	0.0817	female	22
70	cntrl	HD	HD_19	1.3165	0.122675	2.319	0.71445	0.7261	0.4647		female	25
71	cntrl	HD	HD_20	0.38425	0.5044	4.2245	2.3655	1.1883	0.3075	0.0557	male	25
72	cntrl	HD	HD_21	0.96015	0.391225		1.94025	1.1091	0.3924	0.04697	female	22
73	cntrl	HD	HD_22	0.4715	0.31565	4.9225	2.89125	1.6509	0.3368	0.07228	female	24
74	cntrl	HD	HD_23	0.62805	0.1987	11.476	2.11275	1.0928	0.2326	0.04824	female	24
75	cntrl	HD	HD_24			4.274	1.17795	0.6905		0.00659	female	26
76	cntrl	HD	HD_25				1.59075	1.38	0.2074	0.02249	female	27
77	cntrl	HD	HD_26	0.8945		4.826	1.23465	0.7153	0.13712	0.02745	female	24
78	cntrl	HD	HD_27	0.6898	0.39515	6.286	2.06925	0.7739	0.2544	0.05748	female	22
79	cntrl	HD	HD_28	0.4565	0.28615						male	27
80	cntrl	HD	HD_29	2.535	0.18485		2.24925	0.5799	0.2544	0.05383	female	25
81	cntrl	HD	HD_30	0.81005	0.08722	5.746	1.29165	0.3304	0.10681		female	24
82	cntrl	HD	HD_31	0.48475	0.1499	3.8755	0.95918	0.819	0.16322	0.0189	female	28
83	cntrl	HD	HD_32	1.729	0.38465	6.8015	1.1214	1.094	0.3294	0.02645	female	31
84	cntrl	HD	HD_33				2.0715	0.9123	0.2325		male	24
85	cntrl	HD	HD_34				1.35735	0.6275	0.2136	0.03743	female	26
86	cntrl	HD	HD_35	0.55925	0.41295		0.7803	0.17538	0.19245	0.00617	female	29
87	cntrl	HD	HD_36	0.4309	0.17675		0.95348		0.14811	0.02149	female	23
88	cntrl	HD	HD_37	0.3778	0.129		0.77048	0.02217	0.13819		female	19
89	cntrl	HD	HD_38	0.40355	0.2233		1.79325	0.5036	0.2948	0.02443	female	26
90	cntrl	HD	HD_39	1.0895	0.10173		1.6335	0.4817	0.203	0.03907	male	22
91	cntrl	HD	HD_40	1.574	0.444		0.9057	0.5678	0.5632	0.0202	female	24
92	cntrl	HD	HD_41	0.70275	0.1115	5.823	1.35728		0.06656	0.03907	male	25
93	cntrl	HD	HD_42	0.91535	0.2609	6.0215	1.7325	0.3534	0.4512	0.02894	male	25
94	cntrl	HD	HD_43	0.92925	0.1808	5.015	0.9981	0.2537	0.09954	0.033	female	24
95	cntrl	HD	HD_44	2.9985	0.1324	6.293	1.91925	1.295	0.2252	0.04245	female	45
96	cntrl	HD	HD_45	0.55715	0.18735	5.9455	1.65675		0.16438	0.03525	male	25
97	cntrl	HD	HD_46	0.8226	0.31895	5.352	0.98175		0.2245	0.03368	female	25
98	cntrl	HD	HD_47	1.4	0.1361	4.5975	1.893	1.762	0.4292	0.05665	female	23
99	cntrl	HD	HD_48	1.0265	0.3704	7.9265	1.24373	0.4663	0.2556	0.07128	female	23
100	cntrl	HD	HD_49	1.3435	0.12175	4.551	0.7095	0.24165	0.15652	0.01495	female	19
101	cntrl	HD	HD_50	1.2905	0.22335	6.625	1.43055	1.0561	0.31	0.03795	female	26
102	cntrl	HD	HD_51	0.55245	0.2952	5.1225	2.80425	0.9229	0.15995	0.1015	male	25
103	cntrl	HD	HD_52	1.1505	0.27545	5.611	1.42313	0.7891	0.4753	0.01079	female	18
104	cntrl	HD	HD_53	1.1365	0.1074	4.067	1.81725	0.6942	0.292	0.0313	female	19
105	cntrl	HD	HD_54	1.058	0.287						female	28
106	PV	PV	PV_01	0.89935	0.178275	6.9035		0.552	0.1104		female	43			134		positive
107	PV	PV	PV_02	2.057	0.235425	6.619		0.7438	0.14876		male	39		22	168
108	PV	PV	PV_03	0.333067	0.23365	6.3355		0.8563	0.17127	0.0351	female	52		166	1887		positive
109	PV	PV	PV_04	1.14	0.292575	6.7005		0.3218	0.06436	0.04546	male	41		<1	583
110	PV	PV	PV_05	0.923425	0.34125	7.2285				0.02169	male	56		3	104		positive
111	PV	PV	PV_06	1.6065	0.39895	8.4925					female	40		15	11532		positive
112	PV	PV	PV_07	0.949775	0.56075	9.84		0.7307	0.14613	0.04617	male	55		34	1556		positive
113	PV	PV	PV_08	1.2875	0.11059	14.185		1.2446	0.2489	0.16523	female	44		18	183		positive
114	PV	PV	PV_09	0.564275	0.229725	9.197		0.8454	0.16909	0.29363	male	70		3	1637		positive
115	PV	PV	PV_10	1.7555	0.354625			1.2915	0.2583		male	78		52	178		positive
116	PV	PV	PV_100	0.47675	0.0757					0.01197	female	25		67	188
117	PV	PV	PV_11	0.879025	0.361875	7.025	2.616	0.4875	0.4632	0.0617	male	31		199	1072
118	PV	PV	PV_12	1.46875	0.2894	9.114	3.61275	0.8009	0.3523	0.01776	female	30		4	65
119	PV	PV	PV_13	0.420775	0.49875	8.0665	3.957	0.5729	0.4277	0.03085	male	48		63	189		positive
120	PV	PV	PV_14	0.3642	0.3897	5.9925	2.02125	1.5938	0.406	0.04723	male	41		3	767
121	PV	PV	PV_15	0.726	0.2039	5.883	3.54225	0.6095	0.3368	0.02773	male	44		148	55		positive
122	PV	PV	PV_16	0.5327	0.18985	3.6265	2.0685		0.18164		female	78		160	294		positive
123	PV	PV	PV_17	0.538	0.3288	4.7285		1.0684	0.12169	0.0263	male	50		89	158		positive
124	PV	PV	PV_18	1.507	0.2837	4.094	2.05875	0.5463	0.3751		female	60		15	75		positive
125	PV	PV	PV_19	0.33655	0.388	4.875	2.09325		0.04846	0.01644	female	68		3	233		positive
126	PV	PV	PV_20	0.30605	0.306175	5.074	1.05128	0.6635	0.19677	0.00563	male	39		72	1006		positive
127	PV	PV	PV_21	0.71895	0.19055	3.319			0.246	0.03052	female	64		2	50
128	PV	PV	PV_22	0.978	0.06898	3.9575		1.0468	0.13288	0.03052	male	64		29	387		positive
129	PV	PV	PV_23	0.2575	0.36085	6.149		0.3828	0.3672	0.188	male	41		77	616		positive
130	PV	PV	PV_24	0.30715	0.24035	5.692		0.9945	0.3337	0.02705	male	47		187	530		positive
131	PV	PV	PV_25	0.87815	0.20915	2.1625		2.18393	0.04912	0.00636	female	82		101	56		positive
132	PV	PV	PV_26	0.4175	0.261			0.669	0.2363	0.01499	male	28		<2	768		positive
133	PV	PV	PV_27	0.71995	0.40935	4.5105		0.7623	0.0583	0.01604	male	74			517		positive
134	PV	PV	PV_28	0.70835	0.41345	6.186	3.48375		0.15466	0.0682	male	55		109	103		positive
135	PV	PV	PV_29	0.3254	0.1993	16.655					male	32		28	8739		positive
136	PV	PV	PV_30		0.125		1.18823		0.1109	0.0842	male	72		155	543		positive
137	PV	PV	PV_31	0.69665	0.44625	6.549	5.0175		0.3514	0.12393	male	55		247	30		positive
138	PV	PV	PV_32	0.4653	0.53075	6.4805	2.96775		0.2756	0.07313	female	63		45	92		positive
139	PV	PV	PV_33	0.59425	0.2122	3.9995	1.16385		0.14709		female	53			132		positive
140	PV	PV	PV_34	0.60825	0.23795	4.139	2.6175		0.2713	0.07023	male	59		197	111		positive
141	PV	PV	PV_35	0.52435	0.2885	3.873	2.6475		0.4058	0.06615	male	47		176	998		positive
142	PV	PV	PV_36	0.51985	0.6566		1.995	1.2366	0.3074	0.04405	male	80		518	103		positive
143	PV	PV	PV_37	0.23975	0.42335		3.594	0.8669	0.2173	0.08813	male	74		8	718		positive
144	PV	PV	PV_38	0.1686	0.1081	3.8215	1.73025	1.5329	0.2368		male	31		184	4206		positive
145	PV	PV	PV_39	0.40815	0.39465	4.5095	7.33575	1.648	0.3409	0.8555	male	48		41	1704		positive
146	PV	PV	PV_40	0.4775	0.51675						female	55		274	36		positive
147	PV	PV	PV_41	1.0195	0.12435	1.5975	1.16663	0.5773	0.3331	0.00978	female	42		3	685		positive
148	PV	PV	PV_42	0.1495	0.1268	5.254	5.862	0.7951	0.4438	0.17338	male	68		35	1248		positive
149	PV	PV	PV_43	0.5006	0.24335	3.639	2.9445	0.5402	0.4834	0.0712	female	87		116	603		positive
150	PV	PV	PV_44	0.33525	0.9637	3.9405	2.8515	0.8982	0.872	0.05998	male	63		187	733		positive
151	PV	PV	PV_45	0.9523	0.17875	2.4945	1.35743	1.3095	0.2768	0.02676	male	63		3	89		positive
152	PV	PV	PV_46	0.90825	0.32265	4.4145	4.45875	0.8937	0.3516	0.05005	female	41		56	640		positive
153	PV	PV	PV_47	0.67035	0.1514	2.546	0.89258	1.2054	0.5876	0.00509	female	79		3	1175
154	PV	PV	PV_48	0.65315	0.2023	5.2005	3.77025	0.6363	0.17628	0.12903		38		64	10844
155	PV	PV	PV_49	0.3765	0.31415	5.3925	1.845	0.6203	0.18853	0.0827	male	49		52	91
156	PV	PV	PV_50	0.9642	0.55095		2.51175	1.4639	0.296	0.06213	male	49		5	460
157	PV	PV	PV_51	0.5695		2.546	3.1575	0.7329	0.17628	0.03746	male	60		4	892
158	PV	PV	PV_52	0.49785	0.1178	3.6755	1.60875	1.1091	0.18582	0.02662	female	27		<2	46
159	PV	PV	PV_53	0.6795	0.25655	2.9265	1.644	0.9712	0.15692	0.0714	male	55		692	1067
160	PV	PV	PV_54	0.6993	0.27095	5.983	3.8355	0.9445	0.3495	0.01034	male	80		126	695
161	PV	PV	PV_55	0.808	0.2133	6.442	2.328	1.2875	0.2456	0.11945	female	39		52	56
162	PV	PV	PV_56	0.5435	0.3	5.8035	6.8385	1.3755	0.3241	0.06883	male	52		8	190
163	PV	PV	PV_57	0.93435	0.244	6.9645	4.09425	1.5639	0.8518	0.09275	male	62		40	189
164	PV	PV	PV_58	0.67825	0.58005	6.212	3.477	1.7087	0.3456	0.06945	female			119	1603
165	PV	PV	PV_59	0.3082	0.36925	6.9275	3.80625	1.4343	0.4188	0.14378	female			4	1191
166	PV	PV	PV_60	0.38955	0.25535	2.9265	1.44405	0.08553	0.2271	0.05948	male	52		74	196
167	PV	PV	PV_61	0.8192	0.5213		2.2515	0.4729	0.09051	0.04289	female	53			2394
168	PV	PV	PV_62	0.7192	0.2501	5.542	2.49975	1.0757	0.421	0.01705	female	52		7	149
169	PV	PV	PV_63	0.74835	0.48935	7.296	4.419	0.8941	0.4303	0.11155	male	43		462	168
170	PV	PV	PV_64			11.1	1.611	0.752	0.2863	0.07713	male	48		<2	108
171	PV	PV	PV_65			6.758	3.957		0.3315	0.05395	male	46			599
172	PV	PV	PV_66				2.50425	0.08342	0.11776		female	62		21	1685
173	PV	PV	PV_67		0.41385	9.14	3.6225	0.9672	0.16672	0.16563	male			88	62
174	PV	PV	PV_68			9.9635	4.3995	1.4376	0.09208	0.05598	male	59		8	178
175	PV	PV	PV_69			4.6835		0.21299	0.11725		female	14		93	134
176	PV	PV	PV_70				2.0895	0.6598	0.11867	0.06498	female	76		<2	340
177	PV	PV	PV_71			6.906	4.93575	0.9064	0.3373	0.1408	male	63		<2	143
178	PV	PV	PV_72				3.83175	1.4643	0.237	0.0737	male	72		3	159
179	PV	PV	PV_73			4.33	1.1136	0.6754	0.3218	0.0134	female	52		3	161
180	PV	PV	PV_74			4.702	1.43528	1.1723	0.3543	0.00232	female	20		17	157
181	PV	PV	PV_75			5.481	1.29248		0.2428	0.00564	male	62		11	412
182	PV	PV	PV_76	1.3475	0.6849		2.034	1.3125	0.2235	0.03656	male	47		173	603
183	PV	PV	PV_77	0.50775	0.33875	3.468	1.24995		0.16181	0.07203	male	85		196	960
184	PV	PV	PV_78	0.6974	0.3256		1.713		0.13196	0.03222	female	30		87	569
185	PV	PV	PV_79	0.4021	0.15295	3.2905	1.86975		0.3219	0.05415	female	58		103	790
186	PV	PV	PV_80	0.5806	0.19025	5.0325		0.7821	0.15239	0.02587	female	71		118	780
187	PV	PV	PV_81	0.4242	0.29075	3.8485	1.26203	0.6665	0.2567	0.02949	male	58		<2	186
188	PV	PV	PV_82	2.2065	0.2253	6.5055	1.30755	1.8768	0.2378		female	38		83	989
189	PV	PV	PV_83	0.43575	0.224	7.7555	2.1405	1.1335	0.251	0.07725	female	68		1209	127
190	PV	PV	PV_84	1.2405	0.45525	5.8535	1.75575	1.3673	0.2752	0.02722	male	55		28	84
191	PV	PV	PV_85	0.62605	0.7081		1.27883	1.3693	0.3929	0.03834	female	70		62	137
192	PV	PV	PV_86	0.36555	0.2953	6.24	2.01675	0.413	0.11273	0.11263	male	64		799	89
193	PV	PV	PV_87	0.7833	0.281	10.259	4.2705	2.0496	0.2575	0.7645	female	59		105	512
194	PV	PV	PV_88	0.5303	0.56455	8.2725	5.0865	1.1913	0.3358	0.2314	male	74		3	1741
195	PV	PV	PV_89	1.915	0.05777	3.295	1.0698	0.9987	0.17412	0.01418	female	52		<2	647
196	PV	PV	PV_90	1.087	0.2443		0.73208	0.6622		0.01974	female	47		38	126
197	PV	PV	PV_91	0.3824	0.40625	3.7265	1.65825	1.1078	0.15508	0.04773	female	80		<2	476
198	PV	PV	PV_92	0.20475	0.17955	4.3365	2.34	0.8039	0.3133	0.07878	female	40		1225	69
199	PV	PV	PV_93	0.34895	0.1135	5.0095	1.87725	0.8986		0.01638	male	56		309	186
200	PV	PV	PV_94	0.983	0.2443		3.68175	2.193	0.4576	0.09305	female	45		876	107
201	PV	PV	PV_95	0.6533	0.14885	4.5505	1.73475	0.9328	0.366	0.04461	female	40		80	614
202	PV	PV	PV_96	0.27415	0.43125	6.384	3.52875	1.7137	0.4601	0.03073	male	78		65	79
203	PV	PV	PV_97	0.22635	0.28965	3.9085					male	58		87	773
204	PV	PV	PV_98	0.63115	0.21125	2.4365					male	54		6	693
205	PV	PV	PV_99	0.23265	0.10158	4.073					female	13		<2	4369
206	PF	PF	PF_01	2.00325	0.58095	6.903		0.6636	0.13272	0.0859	female	75		535	<2		positive
207	PF	PF	PF_02	1.5465	0.1909	6.335		0.8327	0.16655	0.01649	male	67		194	<2		positive
208	PF	PF	PF_03	0.7219	0.203625	9.4445		0.471	0.0942	0.0597	female	34		196	<2		positive
209	PF	PF	PF_04	0.602275	0.658083			0.8182	0.16365	0.04603	male	82		971	<2		positive
210	PF	PF	PF_05	2.3955	0.4074	12.325		0.68	0.13601		male	75		726	<2		positive
211	PF	PF	PF_06	2.47775	0.22935	9.052		1.1382	0.2276		female	45		123	3		positive
212	PF	PF	PF_07	1.2125	0.25005	8.23		0.983	0.1966	0.0205	female	42		219	<2		positive
213	PF	PF	PF_08	0.62005	0.309675			0.4321	0.08643	0.02522	male	64		129	16		positive
214	PF	PF	PF_09	1.9215	0.3513	5.5505					male	86		46	9		positive
215	PF	PF	PF_10	0.483075	0.354525	7.208	2.09775	0.8478	0.28	0.04453	male	57		288	<2		positive
216	PF	PF	PF_100		0.5317			1.1725	0.2345	0.01559	female	65		96	4
217	PF	PF	PF_11	2.2605	0.7224	13.68	9.4725	1.104	0.5261	0.17455	male	86		350	<2		positive
218	PF	PF	PF_12	0.7947	0.433825	8.3735	3.76425	0.4285	0.298	0.09613	female	73		654	5		positive
219	PF	PF	PF_13	2.46225	0.33245	10.485	3.37425	1.3105	0.2377	0.0695	male	74		159	<2		positive
220	PF	PF	PF_14	1.637	0.1836	7.559	1.5795	1.3749	0.1918	0.01935	female	29		188	<2
221	PF	PF	PF_15	0.23115	0.4644	3.501	1.61925	0.4074		0.00394	female	72		>100	3		positive
222	PF	PF	PF_16	0.4664	0.1105	2.9905	2.07525	0.7283	0.2422	0.02591	female	73		119	<2		positive
223	PF	PF	PF_17	1.502	0.2603	4.379	2.67975	0.2202	0.15499	0.09933	female	39		113	<2		positive
224	PF	PF	PF_18	0.93115	0.31845	9.414	7.59225	1.1366	0.3197	0.12208	male	69		92	<2		positive
225	PF	PF	PF_19	0.4181	0.7033	4.4195		2.148	0.6745	0.04458	male	53		140	<2		positive
226	PF	PF	PF_20	1.186	0.3574			0.757	0.454	0.01878		41		1201	<2
227	PF	PF	PF_21	0.49225	0.83675	5.5875		0.6819	0.3223	0.03116	male	78		1058	<2		positive
228	PF	PF	PF_22	0.7491	0.2505	7.2855		0.7442	0.5244	0.06645	female	29		705	<2		positive
229	PF	PF	PF_23	0.4214	0.286	4.189		0.8443	0.5399	0.00811	male	49		66	<2
230	PF	PF	PF_24	0.7621	0.09735	4.6605		0.7551	0.0642	0.05313	male	66		291	10		positive
231	PF	PF	PF_25	1.691	0.1914	8.209	4.48275		0.5322	0.27825	male	89		467	<2		positive
232	PF	PF	PF_26	0.43845	0.9189		4.54575		0.5758		male	57		200	<2
233	PF	PF	PF_27	0.7597	0.2878	5.696			0.209	0.06153	male	60		664	2
234	PF	PF	PF_28	0.3484	0.7414	5.1325	3.531		0.2927	0.11055	male	74		6986	<2		positive
235	PF	PF	PF_29	1.0005	0.36095		1.39065		0.3391	0.03291	female	63		836	<2		positive
236	PF	PF	PF_30	1.229	0.42095	3.8215	1.437		0.3351	0.04105	male	86		116	<2		positive
237	PF	PF	PF_31	1.2685	0.23165	4.549	1.50323		0.5425		female	45		307	<2		positive
238	PF	PF	PF_32	0.66615	0.4346		2.00775	0.8445	0.2804	0.08998	male	53		150	<2		positive
239	PF	PF	PF_33	0.16665	1.0615	6.3865	4.4535	1.1223	0.3976	0.1038	male	65		4244	<2		positive
240	PF	PF	PF_34	0.3251	0.781	5.093	2.8065	0.4243	0.3739	0.02587	female	80		260	<2		positive
241	PF	PF	PF_35	0.6829	0.43995	3.733	1.9125	1.0453	0.5162	0.01625	female	67		154	<2
242	PF	PF	PF_36	0.83105	0.15275	6.1475	3.156	0.5061	0.19547		female	73		392	<2		positive
243	PF	PF	PF_37	0.5706	0.1813			0.4417	0.3209	0.04106	female	80		1021	<2		positive
244	PF	PF	PF_38	0.5956	0.2016	3.303	2.0175	0.5092	0.3316	0.0442	female	89		92	<2		positive
245	PF	PF	PF_39	0.76445	0.36235	4.1615	4.1775	0.3956	0.09492	0.0668	female	88		206	<2		positive
246	PF	PF	PF_40	0.1774	0.31915	3.095	2.06775	0.8048	0.179	0.04188	male	79		109	<2		positive
247	PF	PF	PF_41	1.2995	0.3224	2.897					male	75		76	<2		positive
248	PF	PF	PF_42	0.24325	0.5195		5.295	1.014	0.18171	0.4837	male	71		>200	<2
249	PF	PF	PF_43	0.88675	0.13815	3.2615	7.31475	0.6934	0.3075	0.0525	female	8		106	12		positive
250	PF	PF	PF_44	0.7328	0.38795	3.8885	2.81775		0.2273	0.06043	male	75		167	13
251	PF	PF	PF_45	0.4646	0.23735	3.2615	2.77275	1.2048	0.2246	0.02869	female	29		115	5
252	PF	PF	PF_46	1.5415	0.1571	3.6995	2.20575	1.0689	0.2767	0.0617	female	53		390	<2
253	PF	PF	PF_47	0.5523	0.12495	2.061	2.4	1.3057	0.11527	0.05805	female	35		546	<2
254	PF	PF	PF_48	1.2725	0.24965	8.105	5.18025	0.8591	0.5456	0.28073	female	86		155	<2
255	PF	PF	PF_49	0.23575	0.1861	6.651	4.11525	0.4532	0.1063	0.23215	male	77		1318	<2
256	PF	PF	PF_50	0.24025	0.35875	3.491	3.97125	1.2739	0.3558	0.0647	male	92		710	<2
257	PF	PF	PF_51	3.2225	0.2409	4.9975	5.8215	0.9785	0.08473	0.07163	female	56		457	<2
258	PF	PF	PF_52	0.6113	0.4918	8.092	3.4635	1.4138	0.2909	0.03268	female	62		179	5
259	PF	PF	PF_53	0.84665	0.3321	5.0105	2.067	0.04443	0.0769	0.03122	female	78		9665	9
260	PF	PF	PF_54	0.44505	0.2153						female	37		>10000	<2
261	PF	PF	PF_55	0.695	0.57385	4.4365	1.89975	0.20148	0.13901	0.11175	male	65		15828	4
262	PF	PF	PF_56	0.3657	0.16865	6.358	3.753	0.7906	0.4703	0.09835	female	85		6959	4
263	PF	PF	PF_57	0.394	0.19215	5.1035	2.517	0.6173	0.5079	0.04344	male	65		92	5		positive
264	PF	PF	PF_58	0.9488	0.453		2.14875	0.3883	0.2452		female	84		548	7
265	PF	PF	PF_59	0.4361	0.69985	4.915	3.16275		0.14811	0.10825	female	77		190	<2
266	PF	PF	PF_60	0.44055	0.7874	4.833	1.8585	0.6562	0.2406	0.06273	female	45		67	7
267	PF	PF	PF_61	0.9684	0.43625	7.1355	4.44375	0.09244	0.06949	0.19498	female	82		175	<2
268	PF	PF	PF_62	0.262	0.29715	4.7745	1.62525		0.09512	0.03834	female	80		>100	<2
269	PF	PF	PF_63	0.92935	0.25765	4.915	1.6695			0.04472	female	19		161	6
270	PF	PF	PF_64			9.458	0.9954	1.2483	0.24	0.01562	female	78		133	14		positive
271	PF	PF	PF_65			8.28	2.7825	1.5494	0.2977	0.04786	male	46		52	2
272	PF	PF	PF_66			5.388	1.88475	0.77		0.03795	female	64		45	5
273	PF	PF	PF_67			4.144	0.94335	0.8285	0.2941		male	56		186	<2
274	PF	PF	PF_68			17.825	3.32775	1.3159		0.12335	male	47		1059	<2
275	PF	PF	PF_69			12.11	6.94725	1.4377	0.3683	0.12198	male			853	10
276	PF	PF	PF_70			4.6835	1.57425	0.7104		0.0456	female	77		152	<2
277	PF	PF	PF_71				6.00675	1.5938		0.22503	male	31		910	9
278	PF	PF	PF_72			11.995	2.415	0.3836	0.2084	0.04651	female	85		248	<2
279	PF	PF	PF_73			6.2395		1.1578	0.3596	0.01834	female	47		187	<2
280	PF	PF	PF_74			4.4975	0.93248	0.2705	0.11871		female	27		71	<2
281	PF	PF	PF_75			7.611	2.259	0.8078	0.321	0.1003	female	67		672	<2
282	PF	PF	PF_76	0.7833	0.3116	5.344	1.55415	1.072	0.15619	0.03062	female	76		674	<2
283	PF	PF	PF_77	0.99225	0.2501		2.6205	1.1254	0.2559	0.0933	female	42		137	<2
284	PF	PF	PF_78	0.31265	0.1633	3.395	1.701	0.7205	0.2592	0.05252	female	52		1384	5
285	PF	PF	PF_79	0.92565	0.3342		3.657	1.0297	0.5251	0.01122	female	71		181	<2
286	PF	PF	PF_80	0.37855	0.78305	11.635	4.263	1.7237	0.4904	0.06283	male	66		132	<2
287	PF	PF	PF_81	1.3085	0.42275		2.37225	1.1399	0.2411	0.0187	female	71		120	<2
288	PF	PF	PF_82	0.98805	0.3619	5.7495	7.71975		0.4385	0.07348	female	87		588	2
289	PF	PF	PF_83	0.62055	0.5094	3.2905	0.91965	0.19209	0.08454	0.0156	male	61		98	<2
290	PF	PF	PF_84	0.84705	0.6171	6.8425	2.18775	0.5175	0.2976	0.01253	female	59		181	2
291	PF	PF	PF_85	0.6338	0.2528	5.1075	1.22138	1.0389	0.3187	0.03206	male	61		63	<2		positive
292	PF	PF	PF_86	0.4736	0.398	4.4835	1.60425	0.8136		0.07893	male	77		739	<2
293	PF	PF	PF_87	1.356	0.2837	5.188	1.93425	4.014	0.3086	0.05168	female	36		2613	<2
294	PF	PF	PF_88	0.48845	0.25645	4.419	1.98825	0.2072		0.02108	female	62		59	4
295	PF	PF	PF_89	0.49585		8.636	2.5665	0.4923	0.2883	0.03867	male	71		253	<2
296	PF	PF	PF_90	0.4626	0.20585	3.5945	1.57875		0.274	0.04757	female	79		205	<2
297	PF	PF	PF_91	0.56105	0.28945	6.1385	1.35945	1.891	0.2376	0.02658	male	53		79	<2
298	PF	PF	PF_92	1.816	0.35975	5.0095	2.39775	1.6409	0.6621	0.01351	female	62		195	<2
299	PF	PF	PF_93	0.56475	0.7645	3.2615	1.28805		0.1934	0.03222	male	59		596	<2
300	PF	PF	PF_94	0.5549	0.09377	4.4355	2.22075	1.7613	0.4348			73		116	<2
301	PF	PF	PF_95	0.7211	0.1574	5.8765	2.18925	1.3663	0.15378		male	80		851	5
302	PF	PF	PF_96	0.3576	0.52815	7.433	3.1545	0.9343	0.2075	0.06613	female	72		3351	5
303	PF	PF	PF_97	0.4774	0.3356	6.351	2.3565	0.3699	0.18106	0.04378	female	64		229	<2		positive
304	PF	PF	PF_98	0.70135	0.18655	3.991	1.27665	0.7348	0.18106	0.02642	male	77		200	<2
305	PF	PF	PF_99	0.99675	0.78485	5.7625					female	39		142	<2
306	BP	BP	BP_01	0.47835	0.14065						female	78	45				positive
307	BP	BP	BP_02	0.686	0.094385	6.6595		0.7475	0.14948	0.00156	female	89	356				positive
308	BP	BP	BP_03	1.83525	0.60085	11.505		1.6899	0.338		female	85	72				positive
309	BP	BP	BP_04	1.06185	0.290275	7.249		0.3987	0.07974	0.00845	male	75	117				positive
310	BP	BP	BP_05	0.9336	0.411825	12.62		1.3023	0.2605		male	68	154				positive
311	BP	BP	BP_06	0.761575	0.5634	5.75		0.3553	0.07107	0.03597	male	80	425				positive
312	BP	BP	BP_07	1.31	0.3658	9.716		0.5005	0.1001		male	77	90				positive
313	BP	BP	BP_08	0.390975	0.4164	7.8205		0.506	0.1012	0.03871	female	90	117				positive
314	BP	BP	BP_09	1.3195	0.2356	7.514		0.7383	0.14767	0.04302	female	86	196				positive
315	BP	BP	BP_10	3.10375	0.21945	3.237		0.6161	0.12323	0.01182	female	79	155				positive
316	BP	BP	BP_100	0.2388	0.2669			1.5762	0.3153	0.09055	male	76	1245				positive
317	BP	BP	BP_11	0.3874	0.35335	10.189		0.4986	0.09973		female	75	116				positive
318	BP	BP	BP_12	0.29525	0.7984	10.67	3.42075	0.5899	0.2347	0.04556	male	85	83				positive
319	BP	BP	BP_13		0.438	14.68					female	84	8469				positive
320	BP	BP	BP_14	0.3959	0.55805	8.811	5.8035	0.8301	0.4527	0.27075	male	87	397				positive
321	BP	BP	BP_15	0.4193	0.4053	5.875	2.86725	0.6842	0.3303	0.10038	female	85	480				positive
322	BP	BP	BP_16	0.8	0.3736	5.1915	4.44225		0.227	0.064	female	85	201				positive
323	BP	BP	BP_17	1.209	0.17195		2.37075	0.264	0.1799	0.0115	female	61	78				positive
324	BP	BP	BP_18	0.4653	0.4268	6.1095	3.4005	0.9104	0.3852	0.09243	female	80	208				positive
325	BP	BP	BP_19	0.886	0.3447	4.5745	3.09225	0.3303	0.3237	0.24123	female	82	82				positive
326	BP	BP	BP_20	0.3824	0.04701	17.785	9.099		0.16048	0.00934	male	53	193				positive
327	BP	BP	BP_21	0.2299	0.19905	4.0805	1.49573	0.4732	0.2082	0.01763	male	86	579				positive
328	BP	BP	BP_22	0.84855	0.5891	6.622	2.385	1.2345	0.2285	0.05788	female	80	63				positive
329	BP	BP	BP_23	0.26575	0.09869		0.95948	0.539	0.2302	0.02119	female	77	85				positive
330	BP	BP	BP_24	1.924		6.097	2.09775	0.3496	0.16768	0.02773	male	72	556				positive
331	BP	BP	BP_25	0.11875	0.1684				0.08304	0.01813	female	77	1118				positive
332	BP	BP	BP_26	0.5093	0.80535	6.9115		1.0613	0.12308	0.05375	male	87	247				positive
333	BP	BP	BP_27	0.37265	0.3266	5.7745		1.0126	0.2896	0.0125	female	77	188				positive
334	BP	BP	BP_28		0.03351	1.8955		0.52538	0.12129	0.03347	female	89	246				positive
335	BP	BP	BP_29	0.6486	0.22955	5.511		2.2073		0.01276	female	83	91				positive
336	BP	BP	BP_30	0.92815	0.31035	4.216		0.6525	0.313	0.00459	female	83	179				positive
337	BP	BP	BP_31	0.3655	0.57495	6.186		0.5451	0.6132	0.02034	female	87	135				positive
338	BP	BP	BP_32	0.2683	0.17035		0.95895		0.09207	0.04787	female	70	114				positive
339	BP	BP	BP_33	2.0305	0.7555	8.4295	3.6705		0.3021	0.20055	male	58	397				positive
340	BP	BP	BP_34	0.28945	0.1333	4.5615	1.88025		0.2261	0.01061	male	90	34				positive
341	BP	BP	BP_35	0.58085	0.4058		2.9145		0.4253	0.11583	female	94	1160				positive
342	BP	BP	BP_36	1.191	1.037	13.155	6.375		0.3238	0.11188	male	88	86				positive
343	BP	BP	BP_37	0.2149	0.45795		2.547		0.2937	0.10863	female	90	1107				positive
344	BP	BP	BP_38	0.73825	0.57825		2.42325		0.6105	0.04846	female	80	529				positive
345	BP	BP	BP_39	0.81955	0.3014	4.679	1.9125	0.8311	0.19474	0.0718	female	95	105				positive
346	BP	BP	BP_40	0.4145	0.2777	3.1265		0.7276	0.4729	0.07728	male	87	66				positive
347	BP	BP	BP_41	0.54955	0.3914	4.382	4.59975	1.4152	0.4818	0.12553	male	65	45				positive
348	BP	BP	BP_42	0.36935	0.09597	2.6495	1.3086	0.5046	0.3431		female	86	81				positive
349	BP	BP	BP_43	0.3137	0.4173	7.237	3.4365	0.9472	0.2718	0.0505	female	74	184				positive
350	BP	BP	BP_44	0.17975	0.92195	6.41	4.299	1.296	0.6051	0.18378	female	84	1064				positive
351	BP	BP	BP_45	0.18995	0.49845	7.703	8.0085	1.7026	0.3266	0.4478	female	87	141				positive
352	BP	BP	BP_46	0.8867	0.06824	2.474	1.66725	0.2826	0.2469	0.02824	male	89	204				positive
353	BP	BP	BP_47	0.6319	0.3464	2.908	2.9715	0.7314	0.2972	0.04062	female	86	85				positive
354	BP	BP	BP_48	2.282	0.9073	6.334	5.1495	1.7938	0.2947	0.12613	female	79	300				positive
355	BP	BP	BP_49	0.2861	0.43715		5.47275	0.9223	0.179	0.06105	female	75	238				positive
356	BP	BP	BP_50	0.3657	0.1637	4.425	1.39065	1.0808	0.18988	0.00895	male	83	49				positive
357	BP	BP	BP_51	0.2305	0.28885	2.579	3.53475	0.915	0.2921	0.16225	male	86	151				positive
358	BP	BP	BP_52	0.31875	0.12355	8.9715	2.98275		0.2325	0.0619	female	73	261				positive
359	BP	BP	BP_53	1.3	0.268	5.1745	2.097	0.8988	0.3177	0.03705	male	91	106				positive
360	BP	BP	BP_54	0.27485	0.564	5.637	8.373	0.8576	0.3722	0.0792	male	92	851				positive
361	BP	BP	BP_55	0.6454	0.49775	5.8395	1.8825	1.3906	0.4328	0.01759	male	78	46				positive
362	BP	BP	BP_56	0.6001	0.6914	5.9355	1.5885	0.4921	0.19769	0.11728	female	84	51				positive
363	BP	BP	BP_57	0.80985	0.27495	3.4355	2.154	0.3559	0.2776	0.03451	female	68	105				positive
364	BP	BP	BP_58	1.389	0.26565	4.054	0.81443	0.4008	0.13246	0.0152	male	81	175				positive
365	BP	BP	BP_59	0.7223	0.2875		2.622	0.6241	0.2039	0.07823	female	85	472				positive
366	BP	BP	BP_60	0.60385	0.16985	4.3205	1.88925	0.4573	0.2208	0.09323	female	81	156				positive
367	BP	BP	BP_61	0.43675	0.30305	5.0805	2.50275		0.2929	0.23443	female	80	2188				positive
368	BP	BP	BP_62				1.82175	0.954	0.3402	0.02186	male	83	103				positive
369	BP	BP	BP_63			4.1625	1.18335	0.5146	0.11952	0.04563	female	80	168				positive
370	BP	BP	BP_65			7.648	2.5905	0.5716	0.1226	0.0634	male	83	197				positive
371	BP	BP	BP_66			11.005	2.136	0.07598	0.14941	0.01721	male	69	77				positive
372	BP	BP	BP_67	0.05278	0.57245	5.9805	2.6205	0.3044	0.4048	0.11265	male	86	155				positive
373	BP	BP	BP_68			7.0915	2.09775	0.2699		0.10495	female	70	223				positive
374	BP	BP	BP_69	0.4936	0.6079	8.4475	4.05375	0.03884	1.304	0.0837	male	80	176				positive
375	BP	BP	BP_70				1.09988	0.24806	0.3596	0.05328	female	77	88				positive
376	BP	BP	BP_71			8.877	4.3275	0.758	0.7052	0.06003	female	57	242				positive
377	BP	BP	BP_72			6.9245	4.91475		0.4728	0.14133	male	74	451				positive
378	BP	BP	BP_73	1.448	0.143	7.2865					female	64	2709				positive
379	BP	BP	BP_74			6.7025	2.2965	1.9969	0.3184	0.06655	female	67	85				positive
380	BP	BP	BP_75	0.3429	0.16815	3.945	1.974		0.07612	0.03075	male	71	97				positive
381	BP	BP	BP_76	0.6613	0.6794	6.8305	2.15325	0.3482	0.08454	0.04346	male	83	144				positive
382	BP	BP	BP_77	0.6006	0.61535	5.3665	4.083	0.8532	0.5334	0.11313	female	86	159				positive
383	BP	BP	BP_78	0.97505	0.5196	7.0075	5.14125	2.244	0.2419	0.17535	female	65	135				positive
384	BP	BP	BP_79	0.3501	0.4474	3.8485	1.29248		0.2091	0.03816	male	65	1116				positive
385	BP	BP	BP_80	0.5348	0.1075		2.5215	0.2371	0.2559	0.10053	male	82	137				positive
386	BP	BP	BP_81	0.248	0.326	2.2595	1.698	0.9838	0.4384	0.07535	female	93	346				positive
387	BP	BP	BP_82	0.5561	0.2145	2.5205		0.3627	0.2608		female	77	1521				positive
388	BP	BP	BP_83	0.35965	0.57465	4.812	3.6135	0.4599	0.2952	0.06353	male	71	1224				positive
389	BP	BP	BP_84	0.779	0.43905	4.0195	2.20575		0.3365	0.11825	female	86	476				positive
390	BP	BP	BP_85	0.9934	0.78845	8.275		1.0003	0.5259	0.41015	female	86	1870				positive
391	BP	BP	BP_86	0.7323	0.49295		2.595	0.8946	0.3312	0.05978	female	89	159				positive
392	BP	BP	BP_87	0.534	0.10275	3.0785	2.50575	0.6172	0.16832	0.08565	female	81	67				positive
393	BP	BP	BP_88	0.60285	0.44195	5.075	3.63	0.4126	0.5679	0.13678	female	84	249				positive
394	BP	BP	BP_89	0.1933	0.30585	4.024	1.8705	0.2999	0.4015	0.09058	male	87	127				positive
395	BP	BP	BP_90	0.4133	0.12315	8.786	5.5875		0.3376	0.16103	female	88	68				positive
396	BP	BP	BP_91	0.17925	0.23665	3.8755	1.77	2.13	0.4032	0.03107	female	92	3009				positive
397	BP	BP	BP_92	0.17665	0.18655	16.49	2.2155	0.19676	0.14628	0.00908	male	79	51				positive
398	BP	BP	BP_93	0.19585	0.3312	2.692	0.6696		0.2844	0.01957	male	83	193				positive
399	BP	BP	BP_94	0.63975	0.35625	4.4355	2.3115	0.4734		0.01198	female	85	142				positive
400	BP	BP	BP_95	0.68165	0.2044	4.09	1.7715	1.8209	0.7325	0.15335	male	65	777				positive
401	BP	BP	BP_96	0.502		4.9765	1.5975	0.3741	0.2816		female	96	73				positive
402	BP	BP	BP_97	0.08653	0.1364	4.731	0.97575	0.7579	0.3642	0.01062	male	84	81				positive
403	BP	BP	BP_98	0.5992	0.382	3.7595	8.48925	0.7941	0.16583	0.1855	female	94	626				positive
404	BP	BP	BP_99	0.47165				0.421	0.0842	0.03032	female	92	619				positive
405	LAD	LAD	LAD_01					0.9541	0.19077	0.03061	male	61				positive
406	LAD	LAD	LAD_02					0.2957	0.05913	0.00388	male	2				negative	positive
407	LAD	LAD	LAD_03					1.414	0.2828	0.03018	female	43				negative	positive
408	LAD	LAD	LAD_04					0.751	0.15021	0.01559	female	71				negative	positive
409	LAD	LAD	LAD_05					0.6709	0.13419	0.0024	female	79				negative	positive
410	LAD	LAD	LAD_07							0.00844	male	64				negative	positive
411	LAD	LAD	LAD_08				4.4295		0.2367	0.02742	female	26				negative
412	LAD	LAD	LAD_09					1.2728	0.7727	0.13795	male	77				negative	positive
413	LAD	LAD	LAD_10					1.1601	0.3995		male	46				positive	positive
414	LAD	LAD	LAD_11				4.99425	0.6672	0.322	0.01971	male	35				negative	positive
415	LAD	LAD	LAD_12				4.0845	1.7432	0.15863	0.0653	female	90				positive	positive
416	LAD	LAD	LAD_13				2.07825	0.10661	0.11537		male	102				negative	positive
417	LAD	LAD	LAD_14				10.1378	1.2161		0.05238	male	69				negative
418	LAD	LAD	LAD_15				9.9675	0.7432	0.4655	0.04928	male	72				positive	positive
419	LAD	LAD	LAD_16				1.65075	1.2293	0.18675	0.03072	female	84				positive
420	LAD	LAD	LAD_17				3.64875	0.3427	0.395	0.03551	male	86				positive	positive
421	LAD	LAD	LAD_18				1.656	0.14641	0.2452	0.00507	male	57				negative
422	LAD	LAD	LAD_19	0.80545	0.41695	7.978			0.2618	0.01839	male	58				negative
423	LAD	LAD	LAD_20	0.55695	0.4315	7.978		0.7076		0.00193	female	78				negative
424	LAD	LAD	LAD_21	0.29	0.63335	6.788		0.9223		0.0582	male	75				negative
425	LAD	LAD	LAD_22	0.4996	0.9972	9.962		2.116	0.5342	0.01157	male	78				positive
426	LAD	LAD	LAD_23	0.24655	0.88725	8.9555		0.4076	0.16734	0.01473	male	63				negative
427	LAD	LAD	LAD_24	0.502		13.15		1.1008	0.3147	0.0644	female	73				positive	positive
428	LAD	LAD	LAD_25	3.1235	0.2152	4.414	1.71375		0.3083	0.04062	male	75				positive
429	LAD	LAD	LAD_26	2.6615	0.39535		1.33455		0.331	0.01313	male	53				negative
430	LAD	LAD	LAD_27	0.8663	0.29985	26.205			0.8069	0.18328	male	19				negative
431	LAD	LAD	LAD_28	1.122	0.7836	9.2665	3.159		1.1285	0.03902	male	71				positive
432	LAD	LAD	LAD_29	1.942	0.3381						female	47				positive
433	LAD	LAD	LAD_30	0.80665	0.3068	5.1645					female	68				negative
434	LAD	LAD	LAD_31	0.54385	0.5576	5.493					female	43				positive
435	LAD	LAD	LAD_32	1.0935		11.83					female	69				positive
436	LAD	LAD	LAD_33	0.46835	0.55175	7.068					female	37				positive
437	LAD	LAD	LAD_34	0.59965	0.45325						male	35				positive
438	LAD	LAD	LAD_35	1.2055		7.2265					female	76				positive
439	LAD	LAD	LAD_36	1.4975	0.7647	7.5835					female	69				positive	positive
440	LAD	LAD	LAD_37	0.43335	0.1174	3.779					male	3				negative
441	LAD	LAD	LAD_38	1.432		11.53					female	76				positive
442	LAD	LAD	LAD_39	0.59135	0.28065	6.988					female	72				positive	positive
443	LAD	LAD	LAD_40	0.14115	0.75955	7.5835					female	76				positive	positive
444	LAD	LAD	LAD_41	0.2773	0.17225	3.1305					female	82				positive	positive
445	LAD	LAD	LAD_42	0.4224	0.2793	10.54					female					negative	positive
446	LAD	LAD	LAD_43	0.6162	0.57145	8.1355					male	19				negative	positive
447	LAD	LAD	LAD_44	0.72925		6.3855					female					positive	positive
448	LAD	LAD	LAD_45	0.6304	0.9719						male	77				negative	positive
449	LAD	LAD	LAD_46	0.78315	0.23415	9.1105					male	74				negative
450	LAD	LAD	LAD_47	0.99265	0.29875	8.954					male	68				positive
451	LAD	LAD	LAD_48	0.871		7.6235					female	36				negative
452	LAD	LAD	LAD_49	2.037	0.5622	6.0225					male	24				negative
453	LAD	LAD	LAD_50	1.0645	0.37425	4.077					female					positive
454	LAD	LAD	LAD_51	1.343	0.81	10.2665						49				positive
455	LAD	LAD	LAD_52	0.85575	0.6766						male	77				positive
456	LAD	LAD	LAD_53	0.41755	0.57035						female	57				negative
457	LAD	LAD	LAD_54	1.396	0.77435	13.34					female	25				positive
458	LAD	LAD	LAD_55	0.8768	0.4037	6.4275					female	33				positive
459	LAD	LAD	LAD_56	0.694	0.52835	7.3845					male					negative	positive

## Sheet: DescriptiveStatistics1
Condition	Group	Sex	N	Age, Median	Age, Q1	Age, Q3	Age, Min	Age, Max
cntrl	AD	female	27	81	78	84	75	90
cntrl	AD	male	24	80	78	82.5	75	92
cntrl	HD	female	42	24	22	26	18	45
cntrl	HD	male	12	25	25	26	22	37
PV	PV	female	43	52	40	68	13	87
PV	PV	male	56	55	47	64	28	85
PV	PV		1	38	38	38	38	38
PF	PF	female	56	65	45	78	8	89
PF	PF	male	42	67	60	77	31	92
PF	PF		2	73	41	73	41	73
BP	BP	female	60	84	77	87	57	96
BP	BP	male	39	83	73.5	86	53	92
LAD	LAD	female	26	71	43	78	25	90
LAD	LAD	male	28	68	49.5	75	2	102
LAD	LAD		1	49	49	49	49	49
Note, if colum "sex" is blank, no information has been provided on the sex of the patient.

## Sheet: DescriptiveStatistics2
Condition	N	Age, Median	Age, Q1	Age, Q3	Age, Min	Age, Max
cntrl	105	31	24	80	18	92
PV	100	53	43	64	13	87
PF	100	67	53	77	8	92
BP	99	83	77	86.25	53	96
LAD	55	69	44.5	76	2	102
